# Supplementary material
Source: publisher figshare collection journal article supplement (https://gsajournals.figshare.com/articles/dataset/_/12774536)
Supplement: Supplementary file 2 [file 1]

**TABLE S1: Yeast Strains (page 1 of 4)**

| Strain   | Genotype                                                                                                                                                                                                                                                     | Source                     |
|----------|--------------------------------------------------------------------------------------------------------------------------------------------------------------------------------------------------------------------------------------------------------------|----------------------------|
| A20239   | <i>MATa/MATa ho::LYS2/ ho::LYS2 lys2/ lys2 leu2::hisG/ leu2::hisG his3::hisG/ his3::hisG trp1::hisG/ trp1::hisG ura3::pGPD1GAL4(848).ER:URA3/ ura3::pGPD1-GAL4(848).ER:URA3 GALNDT80:TRP1/ GAL-NDT80:TRP KanMX6:pCLB2-3HA-MOB1/KanMX6:pCLB2-3HA-MOB1</i>     | Attner et al. 2012         |
| A22416   | <i>MATa/MATa ho::LYS2/ ho::LYS2 lys2/ lys2 leu2::hisG/ leu2::hisG his3::hisG/ his3::hisG trp1::hisG/ trp1::hisG ura3::pGPD1GAL4(848).ER:URA3/ ura3::pGPD1-GAL4(848).ER:URA3 GALNDT80:TRP1/ GAL-NDT80:TRP1 CDC15-9MYC:TRP1/CDC15-9MYC:TRP1</i>                | Attner et al. 2012         |
| HI50     | <i>MATa/MATa ura3/ura3 leu2/leu2 trp1::hisG/trp1::hisG ARG4/arg4-Nspl his3ΔSK/ his3ΔSK hoΔ::LYS2/hoΔ::LYS2 lys2/lys2 RME1/rme1Δ::LEU2 mxKAN:prCLB2:HA:CDC15/mxKAN:prCLB2:HA:CDC15</i>                                                                        | Pablo-Hernando et al. 2007 |
| AN117-4B | <i>MATa his3 ura3 trp1::hisG leu2 arg4-Nspl lys2 hoΔ::LYS2 rme1::LEU2</i>                                                                                                                                                                                    | Neiman et al. 2000         |
| YS429    | <i>MATa/MATa hoΔ::LYS2/hoΔ::LYS2 lys2/lys2 ura3/ura3 leu2/leu2 trp1::hisG/trp1::hisG his3/his3 arg4-Nsp1/ARG4 RME1/rme1Δ::LEU2 mxKAN:prCLB2:HA:DBF2/mxKAN:prCLB2:HA:DBF2 dbf20Δ::kanMX6/ dbf20Δ::kanMX6</i>                                                  | This study                 |
| LH177    | <i>MATa/MATa ho::LYS2/ho::LYS2 lys2/lys2 ura3/ura3 leu2/leu2 his3/his3 trp1ΔFA/trp1ΔFA</i>                                                                                                                                                                   | Huang et al. 2005          |
| LH872    | <i>MATa/MATa ho::LYS2/ho::LYS2 lys2/lys2 ura3/ura3 leu2/leu2 his3/his3 trp1ΔFA/trp1ΔFA sps1::LEU2<sup>C.g.</sup>/sps1::LEU2<sup>C.g.</sup></i>                                                                                                               | Slubowski et al. 2014      |
| LH875    | <i>MATa/MATa ho::hisG/ho::hisG lys2/lys2 ura3/ura3 leu2/leu2 his3/his3 trp1ΔFA/trp1ΔFA SPS1-13x myc-TRP1/SPS1-13x myc-TRP1</i>                                                                                                                               | Slubowski et al. 2014      |
| LH902    | <i>MATa/MATa ho::LYS2/ho::LYS2 lys2/lys2 ura3/ura3 leu2/leu2 his3/his3 trp1ΔFA/trp1ΔFA HTB2:mCherry:TRP1<sup>C.g.</sup>/HTB2:mCherry:TRP1<sup>C.g.</sup></i>                                                                                                 | Parodi et al. 2012         |
| LH960    | <i>MATa/MATa ho::hisG/ho::hisG lys2/lys2 ura3/ura3 leu2/leu2 his3/his3 trp1ΔFA/trp1ΔFA SPS1-ZZ-URA3<sup>K.I.</sup>/SPS1-ZZ-URA3<sup>K.I.</sup></i>                                                                                                           | Slubowski et al. 2014      |
| LH966    | <i>MATa/MATa ho::hisG/ho::hisG lys2/lys2 ura3/ura3 leu2/leu2 his3/his3 trp1ΔFA/trp1ΔFA HTB2-mCherry-TRP1<sup>C.g.</sup>/HTB2-mCherry-TRP1<sup>C.g.</sup> sps1::LEU2<sup>C.g.</sup>/sps1::LEU2<sup>C.g.</sup></i>                                             | Slubowski et al. 2014      |
| LH976    | <i>MATa/MATa ho::LYS2/ho::LYS2 lys2/lys2 ura3/ura3 leu2/leu2 his3/his3 trp1ΔFA/trp1ΔFA sps1::HIS3<sup>C.g.</sup>/sps1::HIS3<sup>C.g.</sup> HTB2:mCherry:TRP1<sup>C.g.</sup>/HTB2:mCherry:TRP1<sup>C.g.</sup></i>                                             | Slubowski et al. 2014      |
| LH986    | <i>MATa/MATa ho::LYS2/ho::LYS2 lys2/lys2 ura3/ura3 leu2/leu2 his3/his3 trp1ΔFA/trp1ΔFA sfGFP:SPS1/sfGFP:SPS1 HTB2:mCherry:TRP1<sup>C.g.</sup>/HTB2:mCherry:TRP1<sup>C.g.</sup></i>                                                                           | Slubowski et al. 2014      |
| LH1010   | <i>MATa/MATa ho::LYS2/ho::LYS2 lys2/lys2 ura3/ura3 leu2/leu2 his3/his3 trp1ΔFA/trp1ΔFA spo77::HIS3<sup>C.g.</sup>/ spo77::HIS3<sup>C.g.</sup> HTB2:mCherry:TRP1<sup>C.g.</sup>/HTB2:mCherry:TRP1<sup>C.g.</sup></i>                                          | Paulissen et al. 2016      |
| LH1014   | <i>MATa/MATa ho::LYS2/ho::LYS2 lys2/lys2 ura3/ura3 leu2/leu2 his3/his3 trp1ΔFA/trp1ΔFA ama1::TRP1<sup>C.g.</sup>/ama1::TRP1<sup>C.g.</sup> HTB2:mCherry:TRP1<sup>C.g.</sup>/HTB2:mCherry:TRP1<sup>C.g.</sup></i>                                             | Paulissen et al. 2016      |
| LH1066   | <i>MATa/MATa ho::LYS2/ho::LYS2 lys2/lys2 ura3/ura3 leu2/leu2 his3/his3 trp1ΔFA/trp1ΔFA mxKAN:prCLB2:HA:CDC15/mxKAN:prCLB2:HA:CDC15 HTB2:mCherry:URA3<sup>K.I.</sup>/HTB2:mCherry:URA3<sup>K.I.</sup></i>                                                     | This study                 |
| LH1067   | <i>MATa/MATa ho::LYS2/ho::LYS2 lys2/lys2 ura3/ura3 leu2/leu2 his3/his3 trp1ΔFA/trp1ΔFA mxKAN:prCLB2:HA:CDC15/mxKAN:prCLB2:HA:CDC15 sps1::LEU2<sup>C.g.</sup>/sps1::LEU2<sup>C.g.</sup> HTB2:mCherry:URA3<sup>K.I.</sup>/HTB2:mCherry:URA3<sup>K.I.</sup></i> | This study                 |

TABLE S1, continued (page 2 of 4)

| Strain | Genotype                                                                                                                                                                                                                                                                                                            | Source     |
|--------|---------------------------------------------------------------------------------------------------------------------------------------------------------------------------------------------------------------------------------------------------------------------------------------------------------------------|------------|
| LH1068 | <i>MATa/MATa ho::LYS2/ho::LYS2 lys2/lys2 ura3/ura3 leu2/leu2 his3/his3 trp1ΔFA/trp1ΔFA KanMX6:pCLB2-3HA-MOB1/KanMX6:pCLB2-3HA-MOB1 mxKAN:prCLB2:HA:DBF2/mxKAN:prCLB2:HA:DBF2 dbf20Δ::kanMX6/dbf20Δ::kanMX6 HTB2-mCherry-TRP1<sup>C.g.</sup>/HTB2-mCherry-TRP1<sup>C.g.</sup></i>                                    | This study |
| LH1069 | <i>MATa/MATa ho::LYS2/ho::LYS2 lys2/lys2 ura3/ura3 leu2/leu2 his3/his3 trp1ΔFA/trp1ΔFA mxKAN:prCLB2:HA:CDC15/mxKAN:prCLB2:HA:CDC15 SPS1:13myc:TRP1/SPS1:13myc:TRP1</i>                                                                                                                                              | This study |
| LH1070 | <i>MATa/MATa ho::LYS2/ho::LYS2 lys2/lys2 ura3/ura3 leu2/leu2 his3/his3 trp1ΔFA/trp1ΔFA CDC15:9myc:TRP1/CDC15:9myc:TRP1 HTB2:mCherry:TRP1<sup>C.g.</sup>/HTB2:mCherry:TRP1<sup>C.g.</sup></i>                                                                                                                        | This study |
| LH1071 | <i>MATa/MATa ho::LYS2/ho::LYS2 lys2/lys2 ura3/ura3 leu2/leu2 his3/his3 trp1ΔFA/trp1ΔFA sfGFP:SPS1/sfGFP:SPS1 CDC15:9myc:TRP1/CDC15:9myc:TRP1 HTB2:mCherry:TRP1<sup>C.g.</sup>/HTB2:mCherry:TRP1<sup>C.g.</sup></i>                                                                                                  | This study |
| LH1072 | <i>MATa/MATa ho::LYS2/ho::LYS2 lys2/lys2 ura3/ura3 leu2/leu2 his3/his3 trp1ΔFA/trp1ΔFA mxKAN:prCLB2:HA:CDC15/mxKAN:prCLB2:HA:CDC15 HTB2:mCherry:URA3<sup>K.I.</sup>/HTB2:mCherry:URA3<sup>K.I.</sup></i>                                                                                                            | This study |
| LH1075 | <i>MATa/MATa ho::LYS2/ho::LYS2 lys2/lys2 ura3/ura3 leu2/leu2 his3/his3 trp1ΔFA/trp1ΔFA mxKAN:prCLB2:HA:CDC15/mxKAN:prCLB2:HA:CDC15 ama1::TRP1<sup>C.g.</sup>/ama1::TRP1<sup>C.g.</sup></i>                                                                                                                          | This study |
| LH1077 | <i>MATa/MATa ho::LYS2/ho::LYS2 lys2/lys2 ura3/ura3 leu2/leu2 his3/his3 trp1ΔFA/trp1ΔFA HTB2:mCherry:TRP1<sup>C.g.</sup>/HTB2:mCherry:TRP1<sup>C.g.</sup> CDC14:GFP<sup>ENVY</sup>:HIS3<sup>S.p.</sup>/ +</i>                                                                                                        | This study |
| LH1078 | <i>MATa/MATa ho::LYS2/ho::LYS2 lys2/lys2 ura3/ura3 leu2/leu2 his3/his3 trp1ΔFA/trp1ΔFA HTB2:mCherry:TRP1<sup>C.g.</sup>/HTB2:mCherry:TRP1<sup>C.g.</sup> CDC14:GFP<sup>ENVY</sup>:HIS3<sup>S.p.</sup>/ + sps1::LEU2<sup>C.g.</sup>/sps1::LEU2<sup>C.g.</sup></i>                                                    | This study |
| LH1079 | <i>MATa/MATa ho::LYS2/ho::LYS2 lys2/lys2 ura3/ura3 leu2/leu2 his3/his3 trp1ΔFA/trp1ΔFA HTB2:mCherry:TRP1<sup>C.g.</sup>/HTB2:mCherry:TRP1<sup>C.g.</sup> CDC14:GFP<sup>ENVY</sup>:HIS3<sup>S.p.</sup>/ +</i>                                                                                                        | This study |
| LH1080 | <i>MATa/MATa ho::LYS2/ho::LYS2 lys2/lys2 ura3/ura3 leu2/leu2 his3/his3 trp1ΔFA/trp1ΔFA HTB2:mCherry:TRP1<sup>C.g.</sup>/HTB2:mCherry:TRP1<sup>C.g.</sup> CDC14:ENVY:HIS3<sup>S.p.</sup>/ + KanMX6:pCLB2-3HA-MOB1/KanMX6:pCLB2-3HA-MOB1 mxKAN:prCLB2:HA:DBF2/ mxKAN:prCLB2:HA:DBF2 dbf20Δ::kanMX6/dbf20Δ::kanMX6</i> | This study |
| LH1081 | <i>MATa/MATa ho::LYS2/ho::LYS2 lys2/lys2 ura3/ura3 leu2/leu2 his3/his3 trp1ΔFA/trp1ΔFA KanMX6:pCLB2-3HA-MOB1/KanMX6:pCLB2-3HA-MOB1 mxKAN:prCLB2:HA:DBF2/ mxKAN:prCLB2:HA:DBF2 dbf20Δ::kanMX6/dbf20Δ::kanMX6</i>                                                                                                     | This study |
| LH1083 | <i>MATa/MATa ho::LYS2/ho::LYS2 lys2/lys2 ura3/ura3 leu2/leu2 his3/his3 trp1ΔFA/trp1ΔFA CDC15:9myc:TRP1/CDC15:9myc:TRP1 HTB2:mCherry:TRP1<sup>C.g.</sup>/HTB2:mCherry:TRP1<sup>C.g.</sup> sps1::LEU2<sup>C.g.</sup>/ sps1::LEU2<sup>C.g.</sup></i>                                                                   | This study |

TABLE S1, continued (page 3 of 4)

| Strain | Genotype                                                                                                                                                                                                                                                                                                                                              | Source     |
|--------|-------------------------------------------------------------------------------------------------------------------------------------------------------------------------------------------------------------------------------------------------------------------------------------------------------------------------------------------------------|------------|
| LH1084 | <i>MATa/MATa ho::LYS2/ho::LYS2 lys2/lys2 ura3/ura3 leu2/leu2 his3/his3 trp1ΔFA/trp1ΔFA CDC14:ENVY: HIS3<sup>S.p.</sup>/ CDC14:ENVY: HIS3<sup>S.p.</sup> NOP56:mCherry: TRP1<sup>C.g.</sup>/ NOP56:mCherry: TRP1<sup>C.g.</sup></i>                                                                                                                    | This study |
| LH1085 | <i>MATa/MATa ho::LYS2/ho::LYS2 lys2/lys2 ura3/ura3 leu2/leu2 his3/his3 trp1ΔFA/trp1ΔFA CDC14:GFP<sup>ENVY</sup>:HIS3<sup>S.p.</sup>/ CDC14:GFP<sup>ENVY</sup>:HIS3<sup>S.p.</sup> sps1::LEU2<sup>C.g.</sup>/sps1::LEU2<sup>C.g.</sup> NOP56:mCherry: TRP1<sup>C.g.</sup>/ NOP56:mCherry: TRP1<sup>C.g.</sup></i>                                      | This study |
| LH1086 | <i>MATa/MATa ho::LYS2/ho::LYS2 lys2/lys2 ura3/ura3 leu2/leu2 his3/his3 trp1ΔFA/trp1ΔFA CDC14:GFP<sup>ENVY</sup>:HIS3<sup>S.p.</sup>/CDC14:GFP<sup>ENVY</sup>:HIS3<sup>S.p.</sup> mxKAN:prCLB2:HA:CDC15/mxKAN:prCLB2:HA:CDC15 NOP56:mCherry:TRP1<sup>C.g.</sup>/ NOP56:mCherry:TRP1<sup>C.g.</sup></i>                                                 | This study |
| LH1087 | <i>MATa/MATa ho::LYS2/ho::LYS2 lys2/lys2 ura3/ura3 leu2/leu2 his3/his3 trp1ΔFA/trp1ΔFA KanMX6:pCLB2-3HA-MOB1/KanMX6:pCLB2-3HA-MOB HTB2:mCherry:TRP1<sup>C.g.</sup>/HTB2:mCherry:TRP1<sup>C.g.</sup></i>                                                                                                                                               | This study |
| LH1088 | <i>MATa/MATa ho::LYS2/ho::LYS2 lys2/lys2 ura3/ura3 leu2/leu2 his3/his3 trp1ΔFA/trp1ΔFA mxKAN:prCLB2:HA:DBF2/mxKAN:prCLB2:HA:DBF2 dbf20Δ::kanMX6/dbf20Δ::kanMX6 HTB2:mCherry:TRP1<sup>C.g.</sup>/ HTB2:mCherry:TRP1<sup>C.g.</sup></i>                                                                                                                 | This study |
| LH1095 | <i>MATa/MATa ho::LYS2/ho::LYS2 lys2/lys2 ura3/ura3 leu2/leu2 his3/his3 trp1ΔFA/trp1ΔFA TUB1+3'UTR::LEU2::HIS3p:ENVY-TUB1/TUB1+3'UTR::LEU2::HIS3p:ENVY-TUB1 HTB2-mCHERRY:TRP1<sup>C.g.</sup>/HTB2-mCHERRY:TRP1<sup>C.g.</sup></i>                                                                                                                      | This study |
| LH1096 | <i>MATa/MATa ho::LYS2/ho::LYS2 lys2/lys2 ura3/ura3 leu2/leu2 his3/his3 trp1ΔFA/trp1ΔFA TUB1+3'UTR::LEU2::HIS3p:ENVY-TUB1/TUB1+3'UTR::LEU2::HIS3p:ENVY-TUB1 HTB2-mCHERRY:TRP1<sup>C.g.</sup>/HTB2-mCHERRY:TRP1<sup>C.g.</sup> mxKAN:prCLB2:HA:CDC15/mxKAN:prCLB2:HA:CDC15</i>                                                                          | This study |
| LH1097 | <i>MATa/MATa ho::LYS2/ho::LYS2 lys2/lys2 ura3/ura3 leu2/leu2 his3/his3 trp1ΔFA/trp1ΔFA TUB1+3'UTR::LEU2::HIS3p:ENVY-TUB1/TUB1+3'UTR::LEU2::HIS3p:ENVY-TUB1 HTB2-mCHERRY:TRP1<sup>C.g.</sup>/HTB2-mCHERRY:TRP1<sup>C.g.</sup> sps1::LEU2<sup>C.g.</sup>/ sps1::LEU2<sup>C.g.</sup></i>                                                                 | This study |
| LH1098 | <i>MATa/MATa ho::LYS2/ho::LYS2 lys2/lys2 ura3/ura3 leu2/leu2 his3/his3 trp1ΔFA/trp1ΔFA TUB1+3'UTR::LEU2::HIS3p:ENVY-TUB1/TUB1+3'UTR::LEU2::HIS3p:ENVY-TUB1 HTB2-mCHERRY:TRP1<sup>C.g.</sup>/HTB2-mCHERRY:TRP1<sup>C.g.</sup> sps1::LEU2<sup>C.g.</sup>/ sps1::LEU2<sup>C.g.</sup> mxKAN:prCLB2:HA:CDC15/mxKAN:prCLB2:HA:CDC15</i>                     | This study |
| LH1099 | <i>MATa/MATa ho::LYS2/ho::LYS2 lys2/lys2 ura3/ura3 leu2/leu2 his3/his3 trp1ΔFA/trp1ΔFA TUB1+3'UTR::LEU2::HIS3p:ENVY-TUB1/TUB1+3'UTR::LEU2::HIS3p:ENVY-TUB1 HTB2-mCHERRY:TRP1<sup>C.g.</sup>/HTB2-mCHERRY:TRP1<sup>C.g.</sup> KanMX6:pCLB2-3HA-MOB1/KanMX6:pCLB2-3HA-MOB1 mxKAN:prCLB2:HA:DBF2/ mxKAN:prCLB2:HA:DBF2 dbf20Δ::kanMX6/dbf20Δ::kanMX6</i> | This study |
| LH1102 | <i>MATa/MATa ho::LYS2/ho::LYS2 lys2/lys2 ura3/ura3 leu2/leu2 his3/his3 trp1ΔFA/trp1ΔFA TUB1+3'UTR::LEU2::HIS3p:ENVY-TUB1/TUB1+3'UTR::LEU2::HIS3p:ENVY-TUB1 HTB2-mCHERRY:TRP1<sup>C.g.</sup>/HTB2-mCHERRY:TRP1<sup>C.g.</sup> sps1<sup>K47R</sup>-zz:TRP1/ sps1<sup>K47R</sup>-zz:TRP</i>                                                              | This study |

TABLE S1, continued (page 4 of 4)

| Strain | Genotype                                                                                                                                                                                                                                                                              | Source     |
|--------|---------------------------------------------------------------------------------------------------------------------------------------------------------------------------------------------------------------------------------------------------------------------------------------|------------|
| LH1103 | <i>MATa/MATα ho::LYS2/ho::LYS2 lys2/lys2 ura3/ura3 leu2/leu2 his3/his3 trp1ΔFA/trp1ΔFA TUB1+3'UTR::LEU2::HIS3p:ENVY-TUB1/TUB1+3'UTR::LEU2::HIS3p:ENVY-TUB1 HTB2-mCHERRY:TRP1<sup>C.g.</sup>/HTB2-mCHERRY:TRP1<sup>C.g.</sup> hho1::TRP1<sup>C.g.</sup>/ hho1::TRP1<sup>C.g.</sup></i> | This study |
| LH1104 | <i>MATa/MATα ho::LYS2/ho::LYS2 lys2/lys2 ura3/ura3 leu2/leu2 his3/his3 trp1ΔFA/trp1ΔFA HTB2:mCherry:TRP1<sup>C.g.</sup>/HTB2:mCherry:TRP1<sup>C.g.</sup> CDC14:GFP<sup>ENVY</sup>:HIS3<sup>S.p.</sup>/ + sps1<sup>K47R</sup>-zz:TRP1/sps1<sup>K47R</sup>-zz:TRP</i>                   | This study |
| LH1105 | <i>MATa/MATα ho::LYS2/ho::LYS2 lys2/lys2 ura3/ura3 leu2/leu2 his3/his3 trp1ΔFA/trp1ΔFA HTB2:mCherry:TRP1<sup>C.g.</sup>/HTB2:mCherry:TRP1<sup>C.g.</sup> CDC14:GFP<sup>ENVY</sup>:HIS3<sup>S.p.</sup>/ + hho1::TRP1<sup>C.g.</sup>/ hho1::TRP1<sup>C.g.</sup></i>                     | This study |
| LH1106 | <i>MATa/MATα ho::LYS2/ho::LYS2 lys2/lys2 ura3/ura3 leu2/leu2 his3/his3 trp1ΔFA/trp1ΔFA HTB2:mCherry:TRP1<sup>C.g.</sup>/HTB2:mCherry:TRP1<sup>C.g.</sup> sps1<sup>K47R</sup>-zz:TRP1/sps1<sup>K47R</sup>-zz:TRP</i>                                                                   | This study |
| LH1107 | <i>MATa/MATα ho::LYS2/ho::LYS2 lys2/lys2 ura3/ura3 leu2/leu2 his3/his3 trp1ΔFA/trp1ΔFA HTB2:mCherry:TRP1<sup>C.g.</sup>/HTB2:mCherry:TRP1<sup>C.g.</sup> hho1::TRP1<sup>C.g.</sup>/ hho1::TRP1<sup>C.g.</sup></i>                                                                     | This study |

**TABLE S2: Yeast Strains Containing Plasmids**

| <b>Strain</b> | <b>Genotype</b>                                           | <b>Source</b>                |
|---------------|-----------------------------------------------------------|------------------------------|
| LH917         | LH902 plus pRS426-G20                                     | Parodi <i>et al.</i> 2012    |
| LH1047        | LH976 ( <i>sps1Δ</i> ) plus pRS426-G20                    | Paulissen <i>et al.</i> 2016 |
| LH1073        | LH1072 ( <i>cdc15-mn</i> ) plus pRS426-E20                | This study                   |
| LH1074        | LH1067 ( <i>sps1 Δ cdc15-mn</i> ) plus pRS426-E20         | This study                   |
| LH1076        | LH1075 ( <i>cdc15-mn ama1 Δ</i> ) plus pRS426-E20         | This study                   |
| LH1081        | LH902 plus pRS426-E20                                     | This study                   |
| LH1082        | LH1068 ( <i>mob1-mn dbf2-mn dbf20 Δ</i> ) plus pRS426-E20 | This study                   |
| LH1089        | LH976 ( <i>sps1 Δ</i> ) plus pRS426-E20                   | This study                   |
| LH1108        | LH1106 ( <i>sps1<sup>K47R</sup></i> ) plus pRS426-E20     | This study                   |
| LH1109        | LH1107 ( <i>hho1Δ</i> ) plus pRS426-E20                   | This study                   |

**TABLE S3: Genes screened for H4S1p phenotype**

| <b>Gene Name</b>            |                         |                          |                               |                |
|-----------------------------|-------------------------|--------------------------|-------------------------------|----------------|
| <i>ADY2</i>                 | <i>HST4</i>             | <i>PLP1</i>              | <i>THI74</i>                  | <i>YDL114W</i> |
| <i>ADY3</i>                 | <i>HUL5</i>             | <i>PRD1</i>              | <i>TMA64</i>                  | <i>YDL162C</i> |
| <i>ALK2</i>                 | <i>ISC10</i>            | <i>PRM2</i>              | <i>TOS10</i>                  | <i>YDL180W</i> |
| <i>AMA1</i>                 | <i>LAA2</i>             | <i>PRR2</i>              | <i>TOS8</i>                   | <i>YDL186W</i> |
| <i>AOR1</i>                 | <i>LCD1</i>             | <i>RGD1</i>              | <i>TPH3</i>                   | <i>YDR015C</i> |
| <i>API2</i>                 | <i>MAM1</i>             | <i>RRG1</i>              | <i>TRS85/GSG1<sup>2</sup></i> | <i>YDR018C</i> |
| <i>ATG9<sup>2</sup></i>     | <i>MCH1</i>             | <i>RRT5</i>              | <i>UBP1</i>                   | <i>YDR042C</i> |
| <i>ATG18<sup>2</sup></i>    | <i>MCY1</i>             | <i>RTT12</i>             | <i>ULI1</i>                   | <i>YDR250C</i> |
| <i>AZR1</i>                 | <i>MFG1</i>             | <i>RXT3</i>              | <i>VHS1</i>                   | <i>YDR491C</i> |
| <i>CDC15<sup>1, 2</sup></i> | <i>MGR1</i>             | <i>SET1<sup>2</sup></i>  | <i>YAP6</i>                   | <i>YEL023C</i> |
| <i>CSM1</i>                 | <i>MIP6</i>             | <i>SPO22</i>             | <i>YCK3</i>                   | <i>YER076C</i> |
| <i>DCV1</i>                 | <i>MND2<sup>2</sup></i> | <i>SPO23</i>             | <i>YEF1</i>                   | <i>YER084W</i> |
| <i>DIG2</i>                 | <i>MPS3</i>             | <i>SPO71</i>             | <i>YSP2</i>                   | <i>YER085C</i> |
| <i>DMA1</i>                 | <i>MUS81</i>            | <i>SPO73</i>             | <i>YSW1</i>                   | <i>YFL040W</i> |
| <i>DTR1</i>                 | <i>NKP1</i>             | <i>SPO75</i>             | <i>YUH1</i>                   | <i>YFR018C</i> |
| <i>EDC2</i>                 | <i>NPP2</i>             | <i>SPO77<sup>2</sup></i> | <i>ZRG8</i>                   | <i>YGL081W</i> |
| <i>FMP10</i>                | <i>OSW7</i>             | <i>SPR6</i>              | <i>YBR063C</i>                | <i>YGL138C</i> |
| <i>FNH1</i>                 | <i>PES4</i>             | <i>SPR28</i>             | <i>YBR134W</i>                | <i>YGL230C</i> |
| <i>GAT4</i>                 | <i>PET18</i>            | <i>SPS22</i>             | <i>YBR144C</i>                | <i>YGL242C</i> |
| <i>GIP1</i>                 | <i>PEX22</i>            | <i>SSM4</i>              | <i>YBR184W</i>                | <i>YGR016W</i> |
| <i>GIS1</i>                 | <i>PEX28</i>            | <i>SSP2</i>              | <i>YBR232C</i>                | <i>YIL024C</i> |
| <i>GMC1</i>                 | <i>PHO92</i>            | <i>SWM1</i>              | <i>YCR061W</i>                | <i>YIL055C</i> |
| <i>HIM1</i>                 | <i>PKP1</i>             | <i>SYP1</i>              | <i>YDL109C</i>                | <i>YJR037W</i> |
| <i>HIT1</i>                 |                         |                          |                               |                |

<sup>1</sup>All strains screened were from the yeast gene knock-out collection in the SK1 background from Rabitsch *et al.* 2001 except for the *cdc15* mutant containing strain, which was from HI50 (Pablo-Hernando *et al.* 2007).

<sup>2</sup>The *atg9*, *atg18*, *cdc15*, *mnd2*, *set1*, *spo77* and *trs85* containing mutant strains exhibited decreased H4S1p phosphorylation.
